# Supplementary material
Source: PubMed Central journal article supplement (PMC3471734)

### Supplementary Figure Legends

Fig. S1. RT-qPCR analysis of DOHH 3'-UTR element luciferase mRNA expression in miR-NC or miR-331-3p/miR-642-5p transfected cells. Data is expressed relative to miR-NC. Error bars represent SD. \*  $p < 0.005$ .

Fig. S2. Reduced miR-331-3p and miR-642-5p expression in a subset of PCa lacking increased DOHH mRNA expression. RT-qPCR analysis of DOHH mRNA, miR-331-3p and miR-642-5p expression in a cohort of 4 matched T vs NAT (N) pairs lacking increased DOHH mRNA expression. Expression of each RNA shown in a boxplot as a ratio of tumor/normal (T/N), where  $>1$  indicates higher expression in tumor than normal tissue, and  $<1$  indicates lower expression in tumor than normal.

Fig. S1

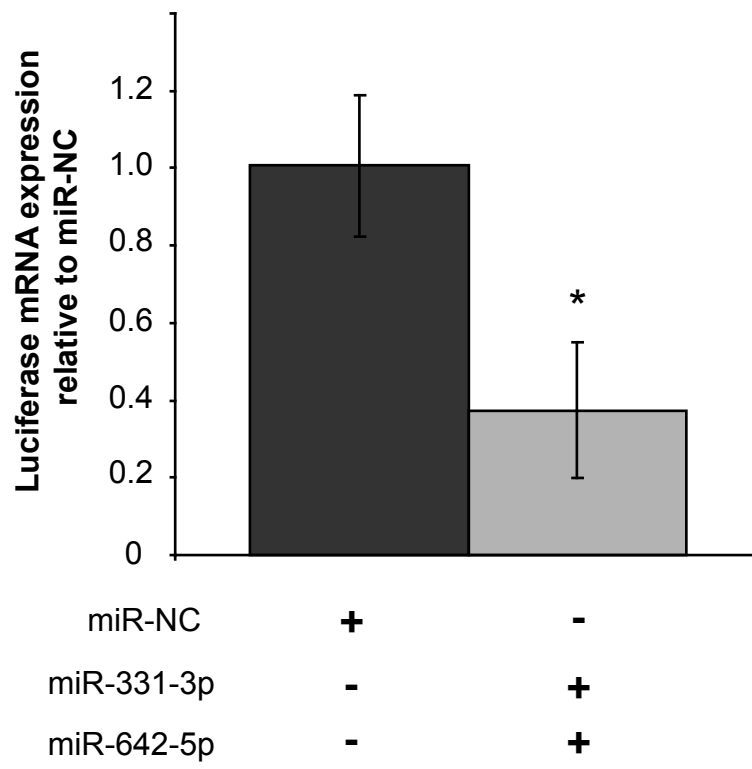

Fig. S2

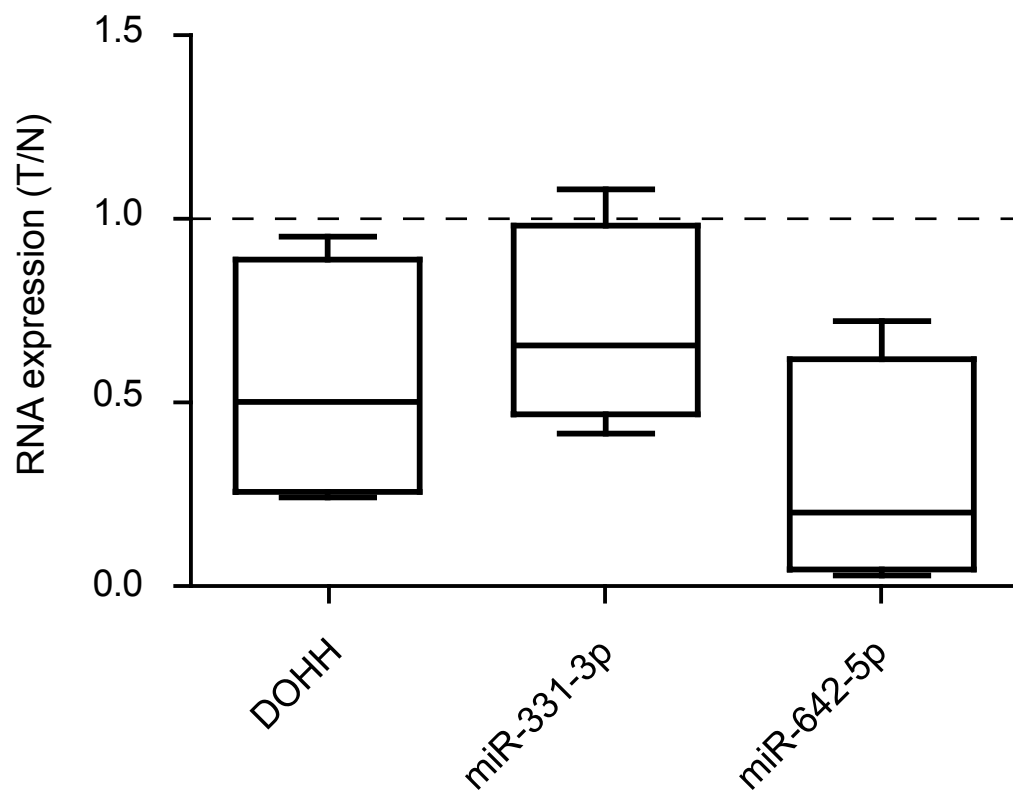

Supplement: supp_M112.374686_jbc.M112.374686-1.pdf [file supp_M112.374686_jbc.M112.374686-1.pdf]
